# Supplementary material for: Indole-3-Acetic Acid in Burkholderia pyrrocinia JK-SH007: Enzymatic Identification of the Indole-3-Acetamide Synthesis Pathway
Source: PubMed Central journal article supplement (PMC6848275; doi:10.3389/fmicb.2019.02559), 2019-11-05
Supplement: Data_Sheet_1.pdf [file Data_Sheet_1.pdf]

**Indole-3-Acetic Acid in *Burkholderia pyrrocinia* JK-SH007:**

**Enzymatic Identification of the Indole-3-Acetamide**

**Synthesis Pathway**

Wan-Hui Liu, Fei-Fei Chen, Chao-En Wang, Huan-Huan Fu, Xue-Qi Fang, Jian-Ren Ye\* and Ji-Yuan  
Shi

## Supplementary Data Sheet

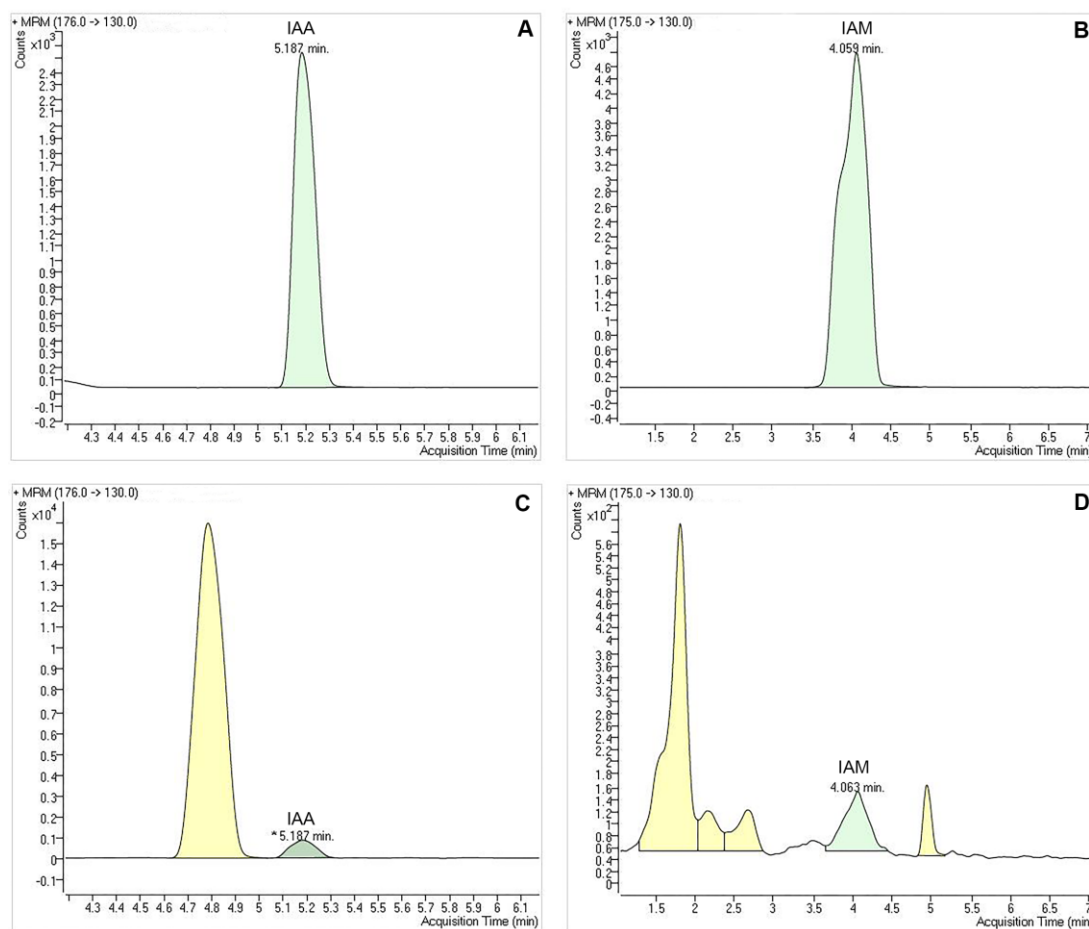

**FIGURE. S1.** Mass spectra of IAA and IAM produced by *B. pyrrocinia* JK-SH007. The spectra were obtained by HPLC-MS/MS. **(A)** Mass spectrum of the standard sample of IAA. **(B)** Mass spectrum of the standard sample of IAM. **(C)** Mass spectrum of IAA produced by *B. pyrrocinia* JK-SH007. **(D)** Mass spectrum of IAM produced by *B. pyrrocinia* JK-SH007.

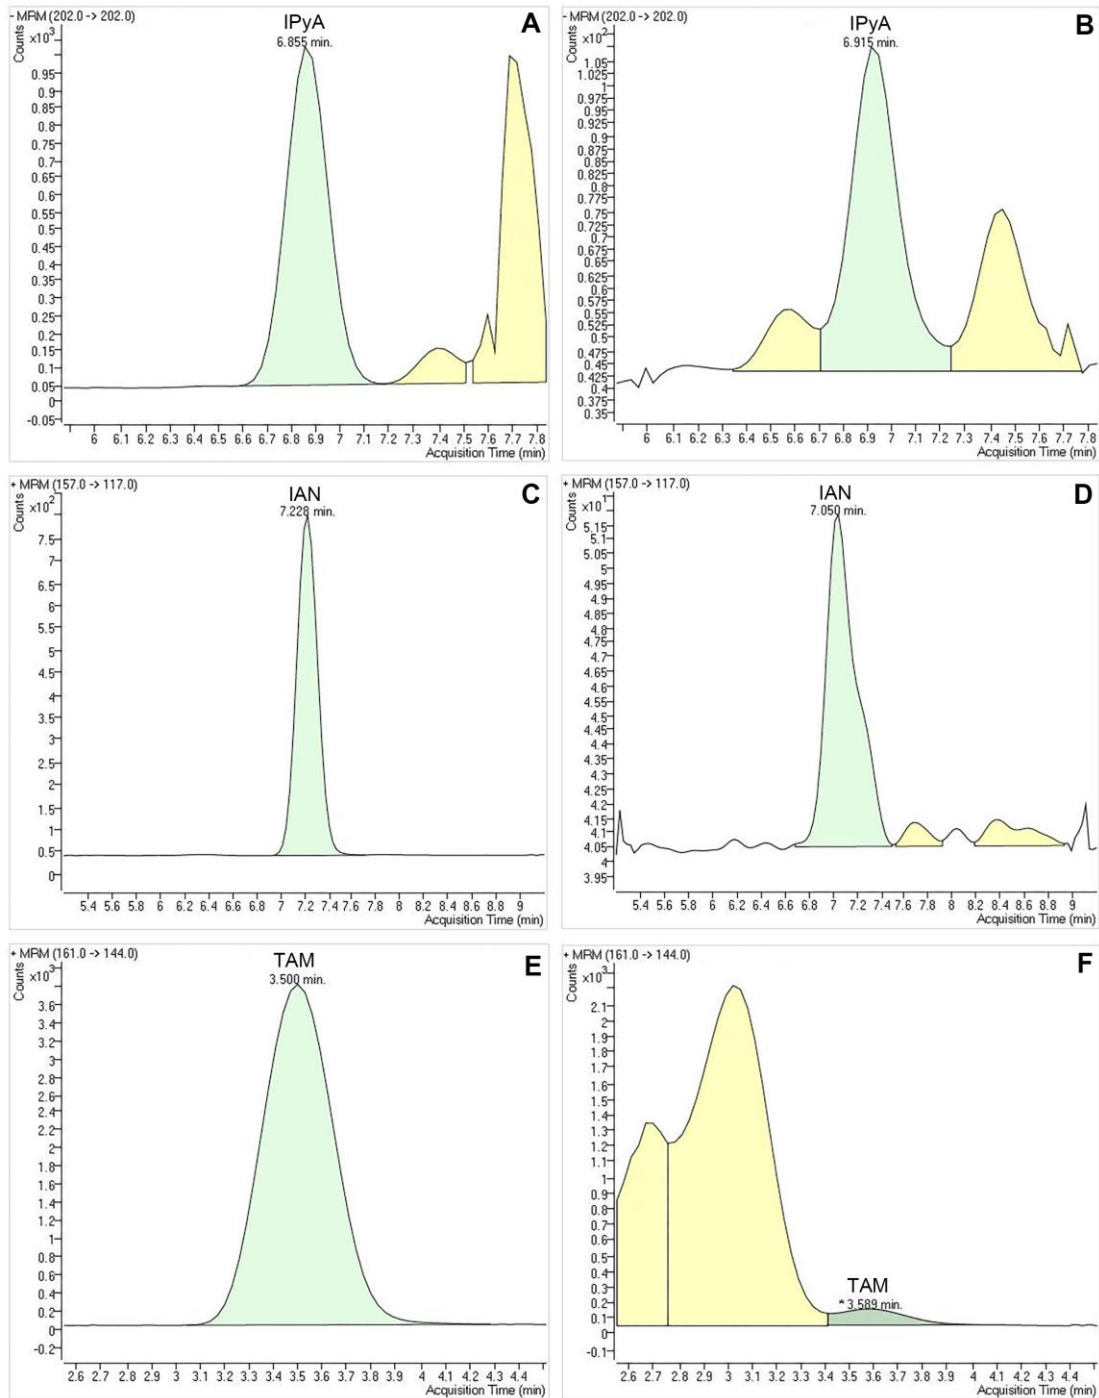

**FIGURE. S2.** Mass spectrometry of IAA synthesis intermediates produced by *B. pyrrocinia* JK-SH007. The spectra were obtained by HPLC-MS/MS. **(A)** Mass spectrum of the standard sample of IPyA. **(B)** Mass spectrum of IPyA produced by *B. pyrrocinia* JK-SH007. **(C)** Mass spectrum of the standard sample of IAN. **(D)** Mass spectrum of IAN produced by *B. pyrrocinia* JK-SH007. **(E)** Mass spectrum of the standard sample of TAM. **(F)** Mass spectrum of TAM produced by *B. pyrrocinia* JK-SH007.

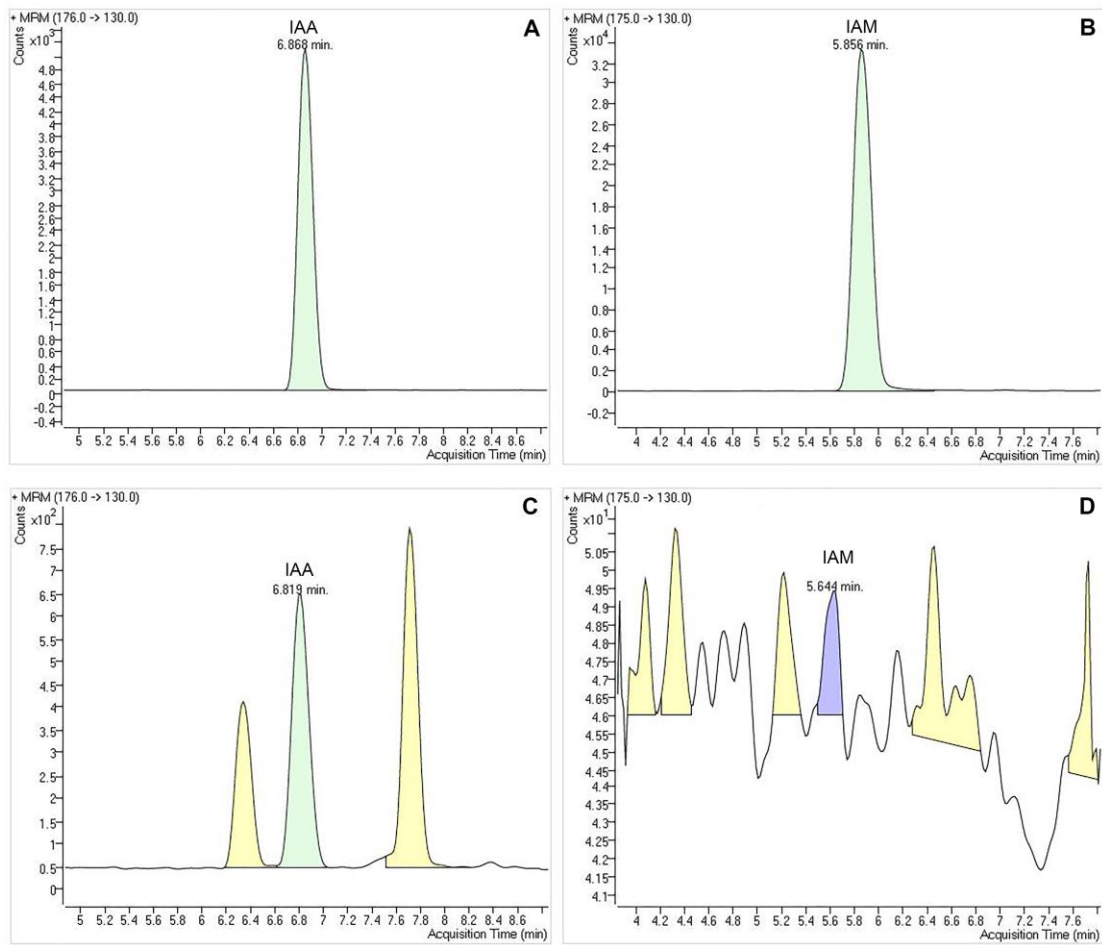

**FIGURE. S3.** IAA and IAM production in the cell-free extract of *B. pyrrocinia* JK-SH007. **(A)** Mass spectrum of the standard sample of IAA. **(B)** Mass spectrum of the standard sample of IAM. **(C)** Mass spectrum of IAA produced by the cell-free extract of *B. pyrrocinia* JK-SH007. **(D)** Mass spectrum of IAM produced by the cell-free extract of *B. pyrrocinia* JK-SH007.

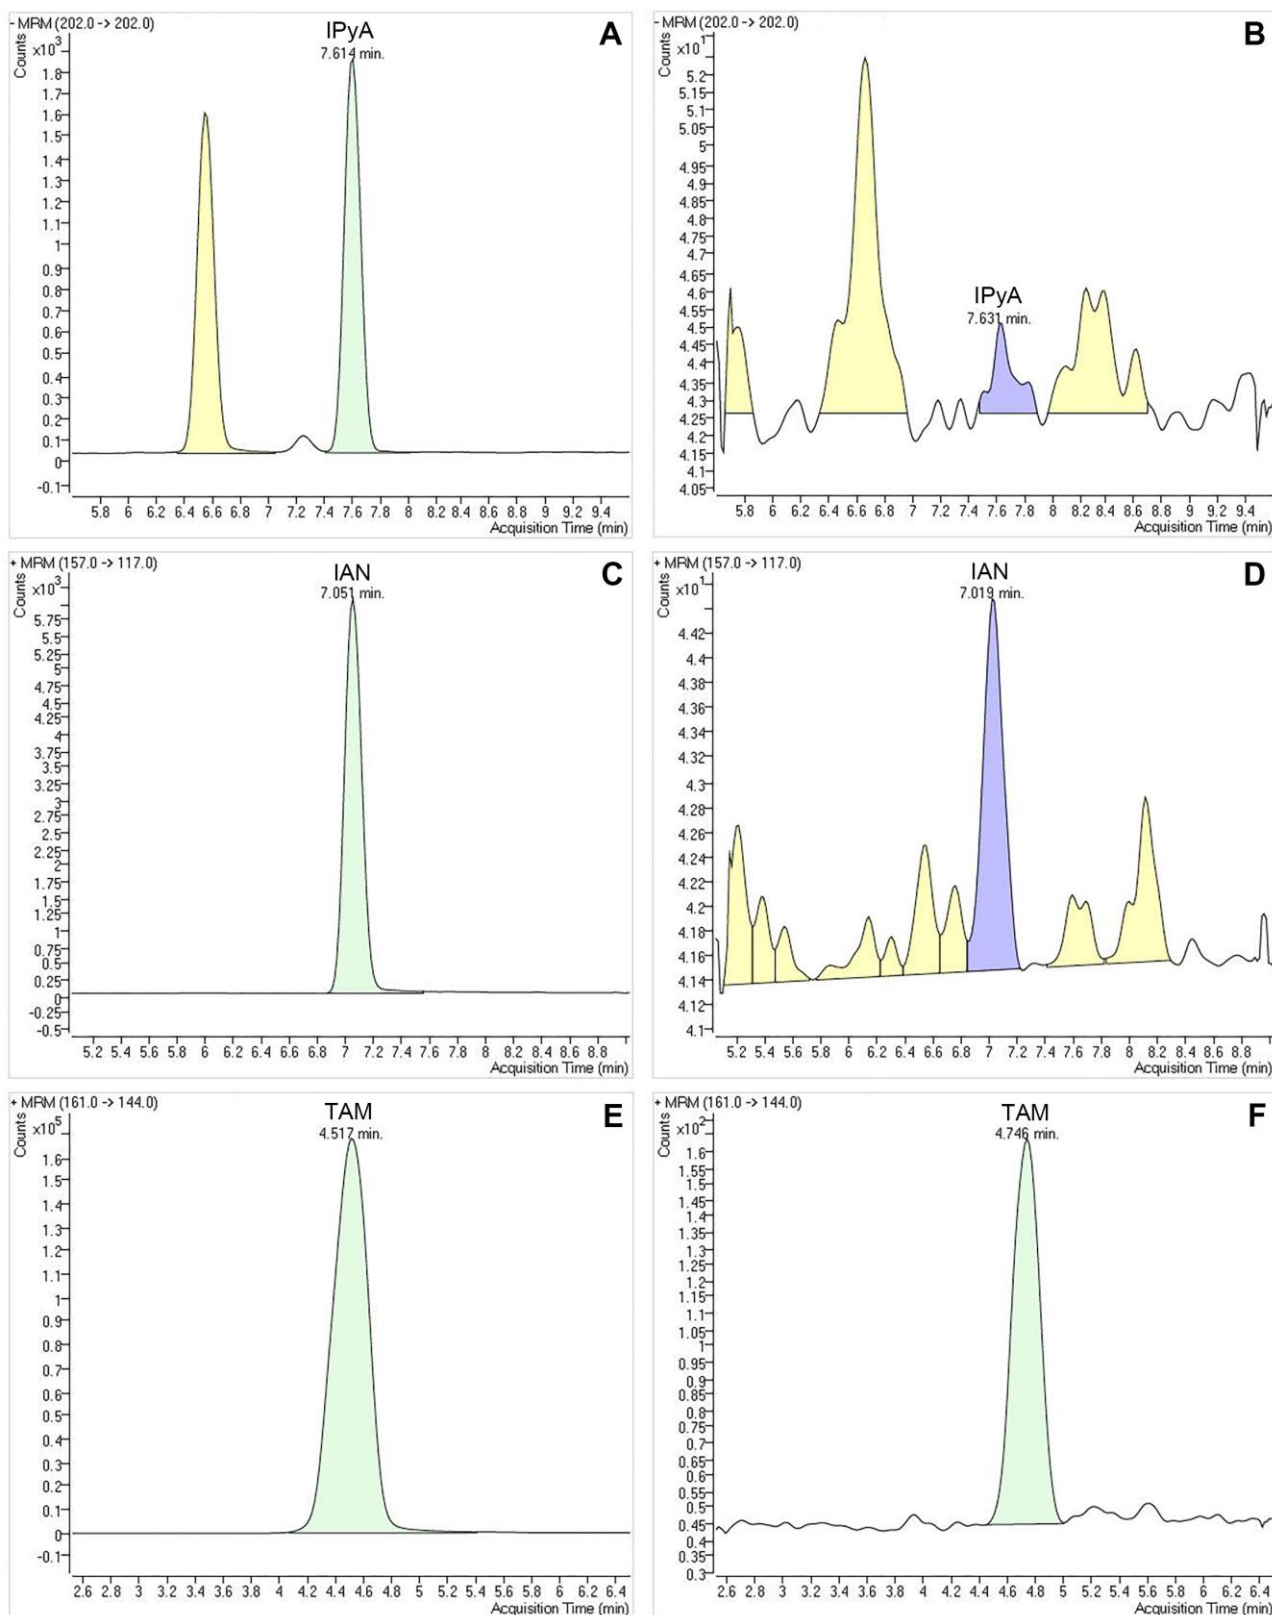

**FIGURE. S4.** Production of IAA synthesis intermediates in cell-free extract of *B. pyrrocinia* JK-SH007. **(A)** Mass spectrum of the standard sample of IPyA. **(B)** Mass spectrum of IPyA. **(C)** Mass spectrum of the standard sample of IAN. **(D)** Mass spectrum of IAN. **(E)** Mass spectrum of the standard sample of TAM. **(F)** Mass spectrum of TAM.

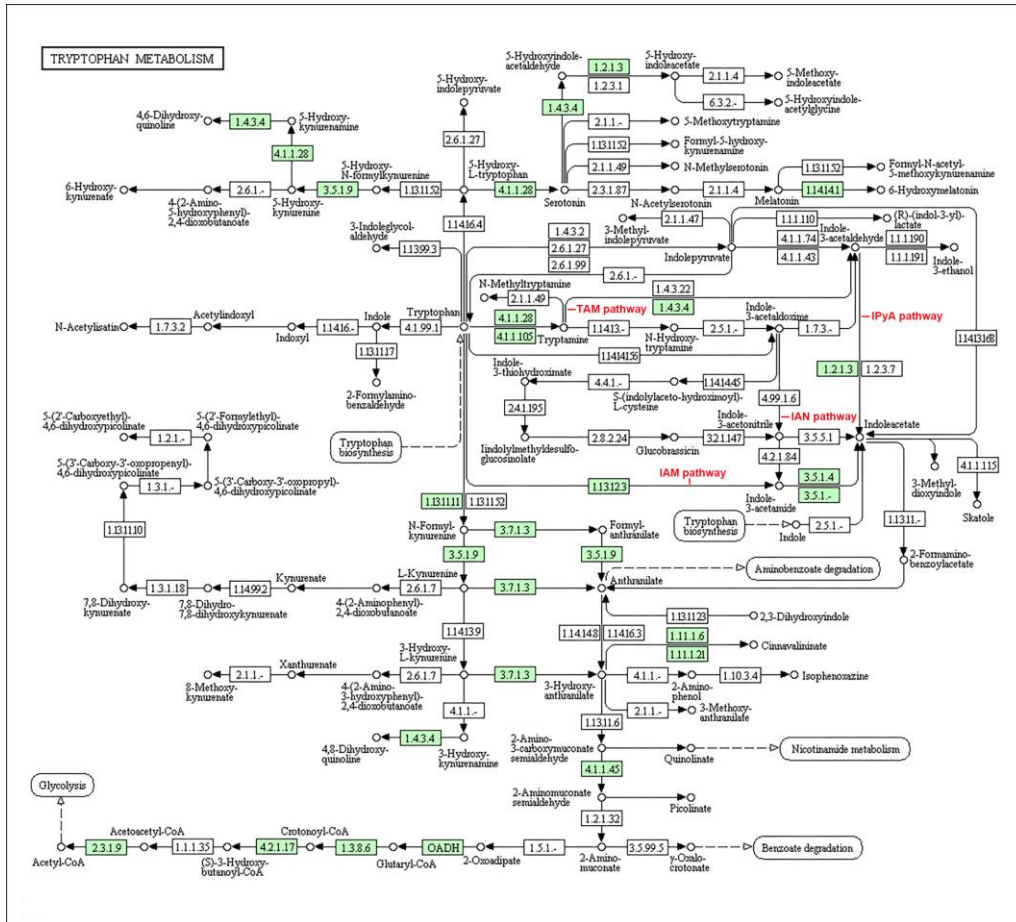

**FIGURE. S5.** Putative “KEGG pathway” of trp metabolism and IAA biosynthetic pathways in the *B. pyrrocinia* JK-SH007. Green-labeled putative genes associated with the IAA synthesis pathways recognized in the *B. pyrrocinia* JK-SH007 genome.

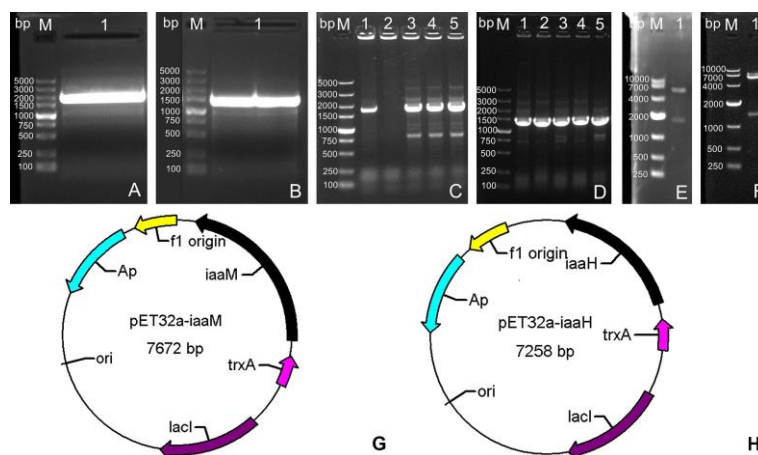

**FIGURE. S6.** (A) Amplification of the *iaaM* gene by PCR. (B) Amplification of the *iaaH* gene by PCR. (C) PCR identification of *iaaM*-positive clones. (D) PCR identification of *iaaH*-positive clones. (E) Double-digestion validation of the recombinant plasmid pET32a-*iaaM*. (F) Double-digestion validation of the recombinant plasmid pET32a-*iaaH*. (G) Maps of the recombinant plasmid pET32a-*iaaM*. (H) Maps of the recombinant plasmid pET32a-*iaaH* (drawn using Winplasm 2.7).

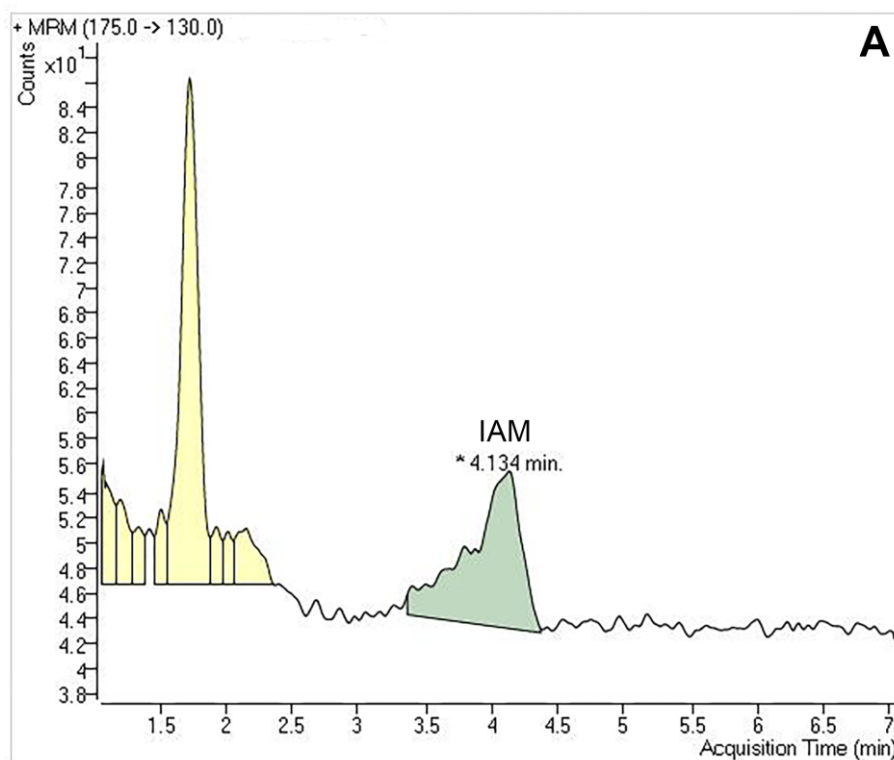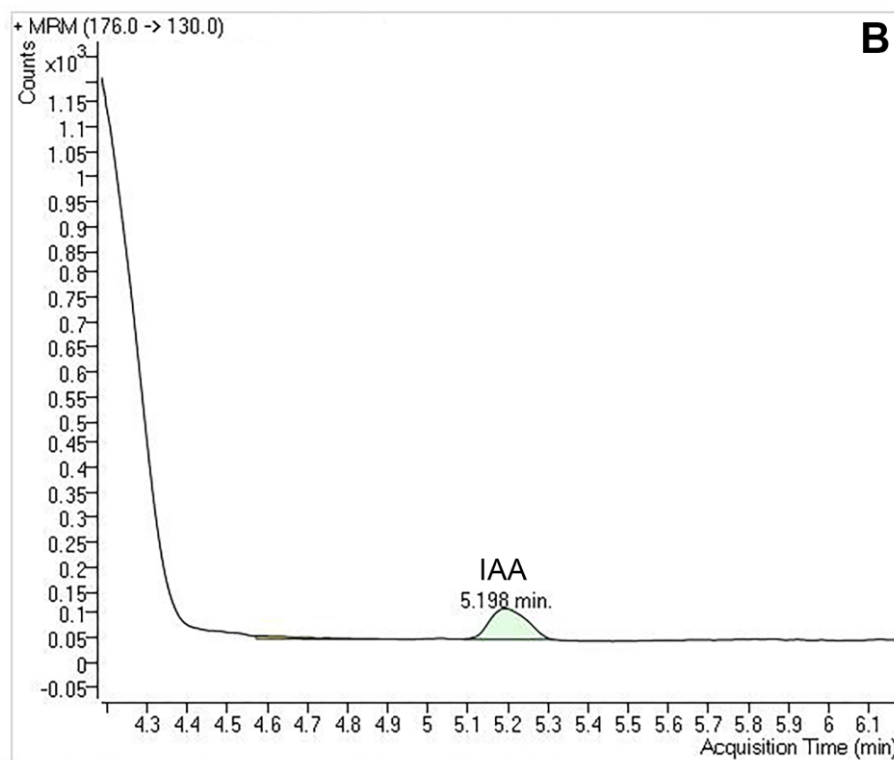

**FIGURE. S7.** IAA and IAM determination through HPLC-MS/MS. **(A)** Mass spectrum of IAM (standard reference figure S1B). **(B)** Mass spectrum of IAA (standard reference figure S1A).
